# Supplementary material for: Catalytic Oppenauer oxidation of secondary alcohols over post-synthesized Sn-Beta
Source: Royal Society of Chemistry journal article supplement (doi:10.1039/d3cy00185g), 2023-01-01
Supplement: d3cy00185g1.pdf [file d3cy00185g1.pdf]

## Catalytic Oppenauer oxidation of secondary alcohols over post-synthesized Sn-Beta

Xianfeng You<sup>a</sup>, Yongming Xu<sup>b</sup>, Tianliang Lu<sup>a,\*</sup>, Nanfang Tang<sup>c,\*</sup>, Wenhao Luo<sup>c,\*</sup>, Xiaomei Yang<sup>d</sup>, Zhongyi Liu<sup>d</sup>

---

<sup>a</sup> School of Chemical Engineering, Zhengzhou University, Zhengzhou 450001, China. E-mail: lutianliang@zzu.edu.cn

<sup>b</sup> Technology Center, China Tobacco Henan Industrial Co., Ltd. Zhengzhou 450001, China

<sup>c</sup> CAS Key Laboratory of Science and Technology on Applied Catalysis, Dalian Institute of Chemical Physics, Chinese Academy of Sciences, Dalian 116023, China. nftang@dicp.ac.cn; w.luo@dicp.ac.cn

<sup>d</sup> Green Catalysis Center and College of Chemistry, Zhengzhou University, 100 Kexue Road, Zhengzhou 450001, China.

## Experimental

### Materials

HBeta zeolite ( $\text{SiO}_2/\text{Al}_2\text{O}_3 = 25$ ) was purchased from Nankai University Catalyst Co. (China).  $\text{SnCl}_4 \cdot 5\text{H}_2\text{O}$  ( $\geq 99\%$ ), naphthalene (AR) and acetone ( $\geq 99\%$ ) were obtained from Tianjin Kermel Reagent Co. (China). MOP ( $\geq 99.5\%$ ), MOA ( $\geq 99\%$ ), pyridine ( $\geq 99\%$ ), deuterated acetonitrile ( $\geq 99.8\%$ ), 1-ethoxy-2-propanol ( $\geq 99\%$ ), 1-methoxy-2-butanol ( $> 93\%$ ), cyclopentanol ( $\geq 99\%$ ), cyclohexanol ( $\geq 98.5\%$ ), 2-butanol ( $\geq 99.5\%$ ), 2-pentanol ( $\geq 98\%$ ), 1-phenylethyl alcohol ( $\geq 98\%$ ), lactic acid ( $\geq 98\%$ ) and methyl lactate ( $> 98\%$ ) were purchased from Aladdin Chemical Reagent Corporation (China). All reactants were used without further purification.

### Calculation the average TORs of different Sn species

Three Sn species (open framework Sn, closed framework Sn, and extraframework Sn species) can be discriminated by the FTIR spectra of adsorbed pyridine and  $\text{CD}_3\text{CN}$ . The TOR ( $\mu\text{mol g}_{\text{cat}}^{-1} \text{h}^{-1}$ ) calculated based on the conversion lower than 15% according to the following equation:

$$TOR = \frac{\text{initial moles of MOP} \times \text{conversion of MOP}}{\text{mass of catalyst} \times \text{reaction time}}$$

According to the respective fractions of FTIR spectra adsorbed  $\text{CD}_3\text{CN}$  (Figure 3), the TOR of different Sn species, can be calculated with the following equation:

$$TOR_{1\text{Sn}-\text{Beta}} = TOR_{\text{Sn open}} \times LAC_{\text{Sn open}}\% + TOR_{\text{Sn closed}} \times LAC_{\text{Sn closed}}\% + TOR_{\text{Sn extra}} \times LAC_{\text{Sn extra}}\%$$

$$TOR_{2\text{Sn}-\text{Beta}} = TOR_{\text{Sn open}} \times LAC_{\text{Sn open}}\% + TOR_{\text{Sn closed}} \times LAC_{\text{Sn closed}}\% + TOR_{\text{Sn extra}} \times LAC_{\text{Sn extra}}\%$$

$$TOR_{3\text{Sn}-\text{Beta}} = TOR_{\text{Sn open}} \times LAC_{\text{Sn open}}\% + TOR_{\text{Sn closed}} \times LAC_{\text{Sn closed}}\% + TOR_{\text{Sn extra}} \times LAC_{\text{Sn extra}}\%$$

The average activity of different active Sn species, denoted as  $TOR_{\text{Sn open}}$ ,  $TOR_{\text{Sn closed}}$  and  $TOR_{\text{Sn extra}}$ .

→

$$1600 = TOR_{\text{Sn open}} \times 31\% + TOR_{\text{Sn closed}} \times 48\% + TOR_{\text{Sn extra}} \times 21\%$$

$$3026 = TOR_{\text{Sn open}} \times 46\% + TOR_{\text{Sn closed}} \times 41\% + TOR_{\text{Sn extra}} \times 13\%$$

$$4006 = TOR_{\text{Sn open}} \times 52\% + TOR_{\text{Sn closed}} \times 27\% + TOR_{\text{Sn extra}} \times 21\%$$

→

$$TOR_{\text{Sn open}} = 8642$$

$$TOR_{\text{Sn closed}} = -2758$$

$$TOR_{\text{Sn extra}} = 1195$$

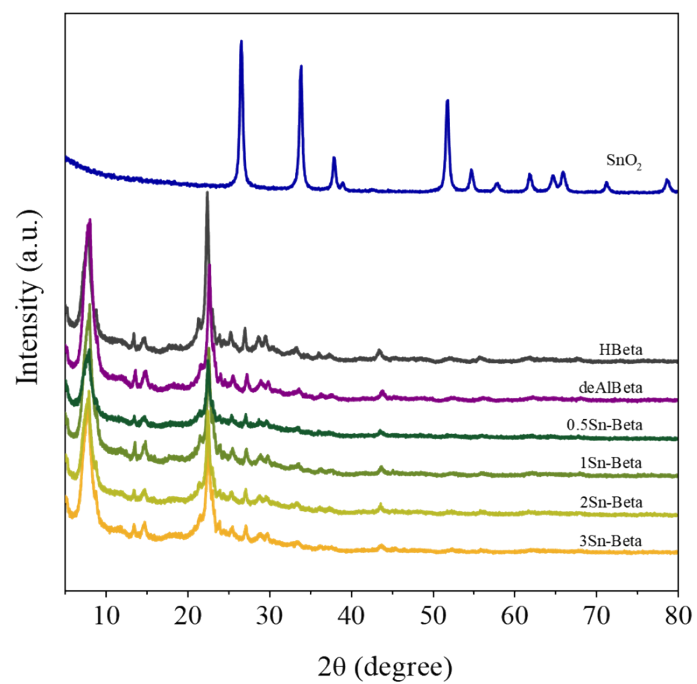

**Figure S1.** XRD patterns of the samples.

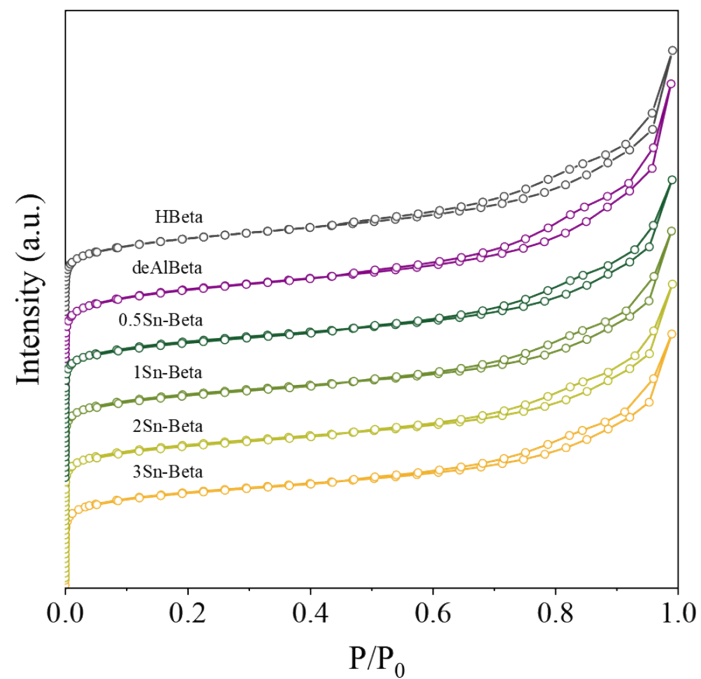

**Figure S2.** N<sub>2</sub> adsorption-desorption isotherms of HBeta, deAlBeta and xSn-Beta.

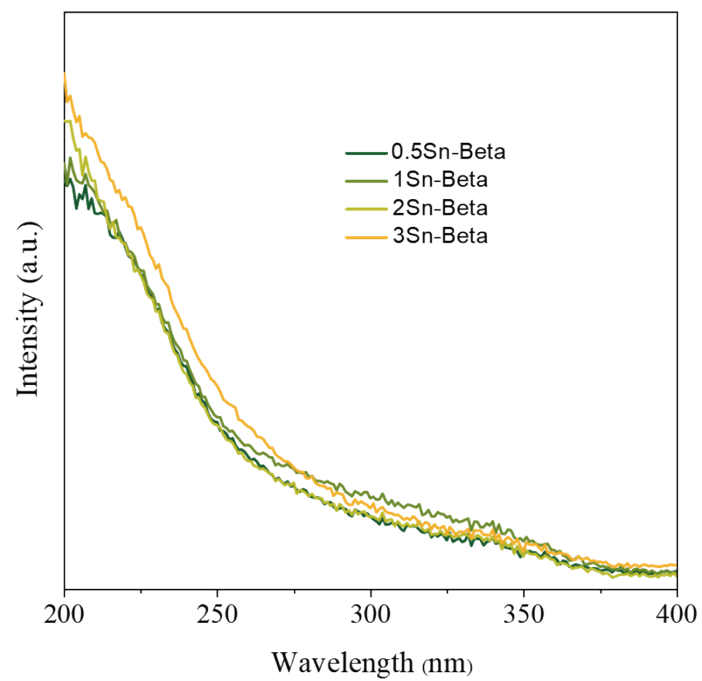

**Figure S3.** UV-vis spectra of xSn-Beta.

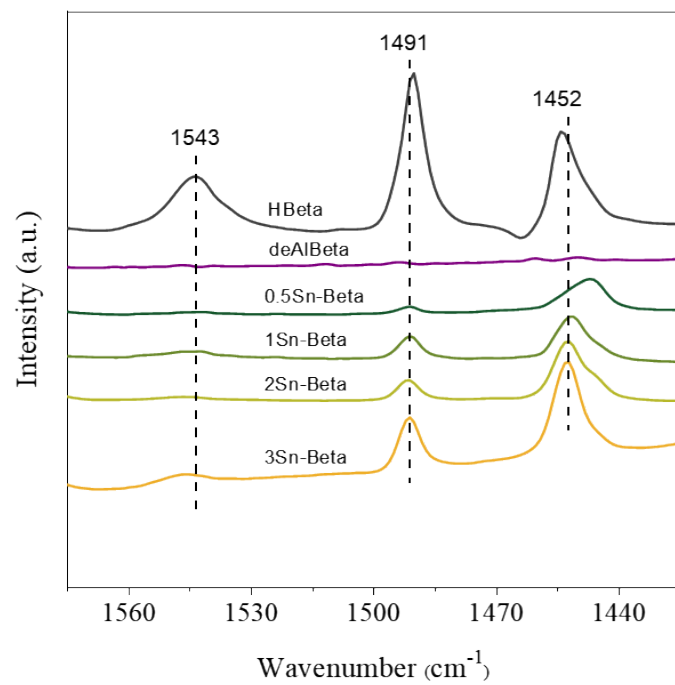

**Figure S4.** FTIR spectra of pyridine adsorbed on the samples. These spectra were collected after evacuation at 150 °C for 30 min
